# Supplementary figures and images for: Bat Systematics in the Light of Unconstrained Analyses of a Comprehensive Molecular Supermatrix
Source: Springer Nature journal article supplement (doi:10.1007/s10914-016-9363-8), 2016-11-24

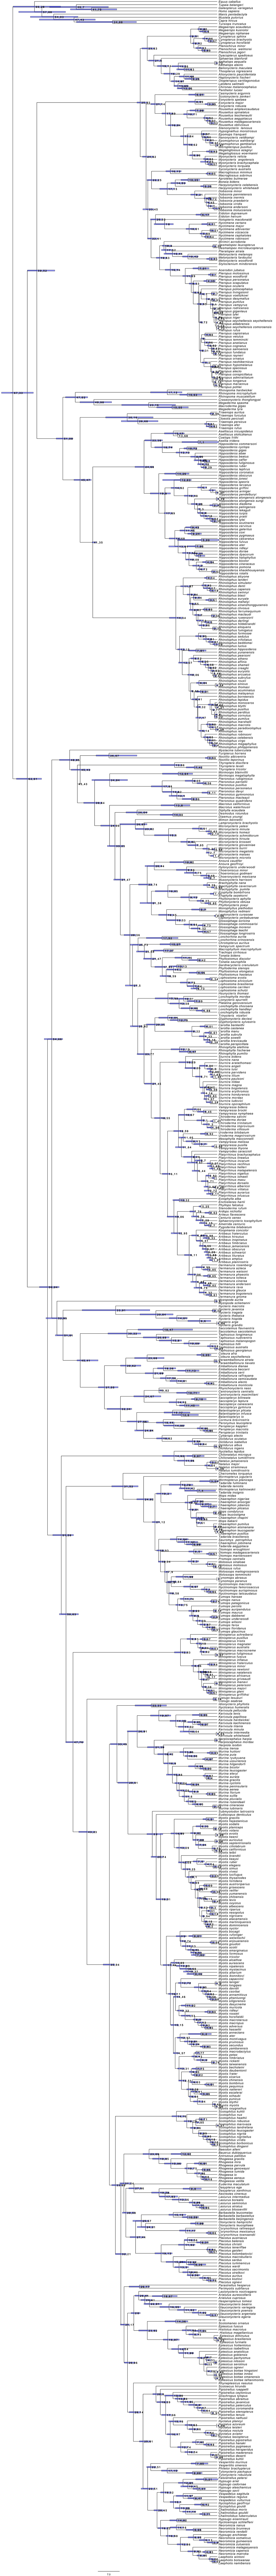

Supplement: 10914_2016_9363_MOESM22_ESM.pdf [file 10914_2016_9363_MOESM22_ESM.pdf]
